# Supplementary material for: Hepatocellular Carcinoma in a 24-Year-Old Female with Beckwith–Wiedemann Syndrome: A Case Report and Review of the Literature
Source: Case Rep Genet. 2020 Oct 7;2020:8811296. doi: 10.1155/2020/8811296 (PMC7563044; doi:10.1155/2020/8811296)
Supplement: Supplementary Materials — Video 1: CT chest, abdomen, and pelvis showed interval development of parenchymal heterogeneity and multiple enhancing nodules and masses in the liver measuring up to 3.6 cm in the right dome. Video 2: On MRI, the patient was found to have a 3 cm lesion in the right hepatic dome of the liver. [file 8811296.f1.zip]

Archive with 4 entries (4 files):
- Video 1.mov
- __MACOSX/._Video 1.mov
- Video 2.mov
- __MACOSX/._Video 2.mov
